# Supplementary material for: The molecular mechanism of the photocatalytic oxidation reactions by horseradish peroxidase in the presence of histidine
Source: Royal Society of Chemistry journal article supplement (doi:10.1039/d0gc01972k), 2020-01-01
Supplement: d0gc01972k1.pdf [file d0gc01972k1.pdf]

## Supplementary Information

### The Molecular Mechanism of the Photocatalytic Oxidation Reactions by Horseradish

#### Peroxidase in the Presence of Histidine

Raheleh Ravanfar, Alireza Abbaspourrad\*

Department of Food Science, Cornell University, Ithaca, NY, 14853, USA

\*Corresponding Author: Alireza Abbaspourrad, email: [alireza@cornell.edu](mailto:alireza@cornell.edu)

## Supplementary Figures

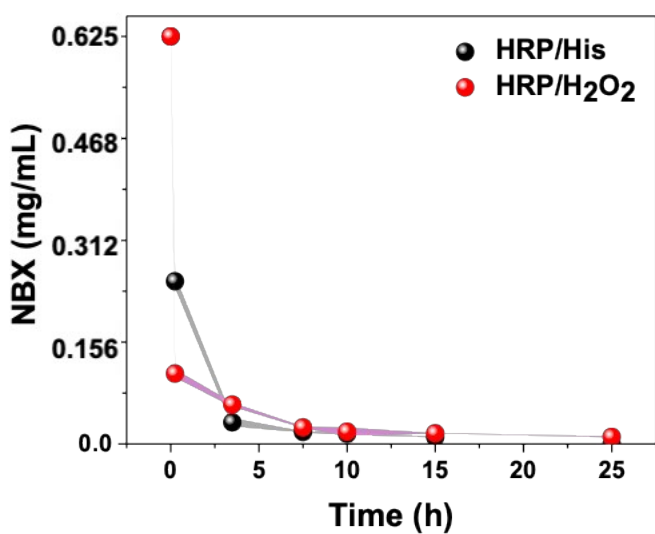

Figure S1. The concentration of NBX (mg/mL) at different time intervals up to 25 h in the HRP/His and HRP/H<sub>2</sub>O<sub>2</sub> systems.

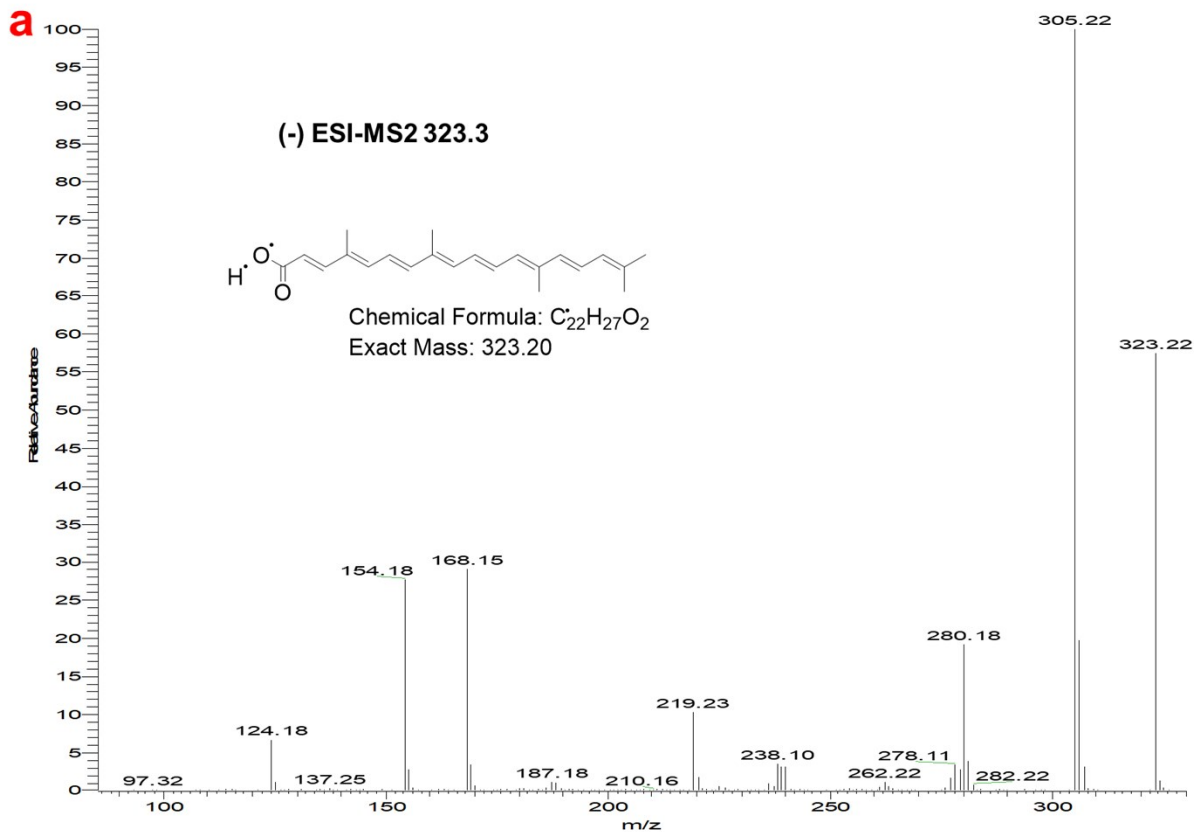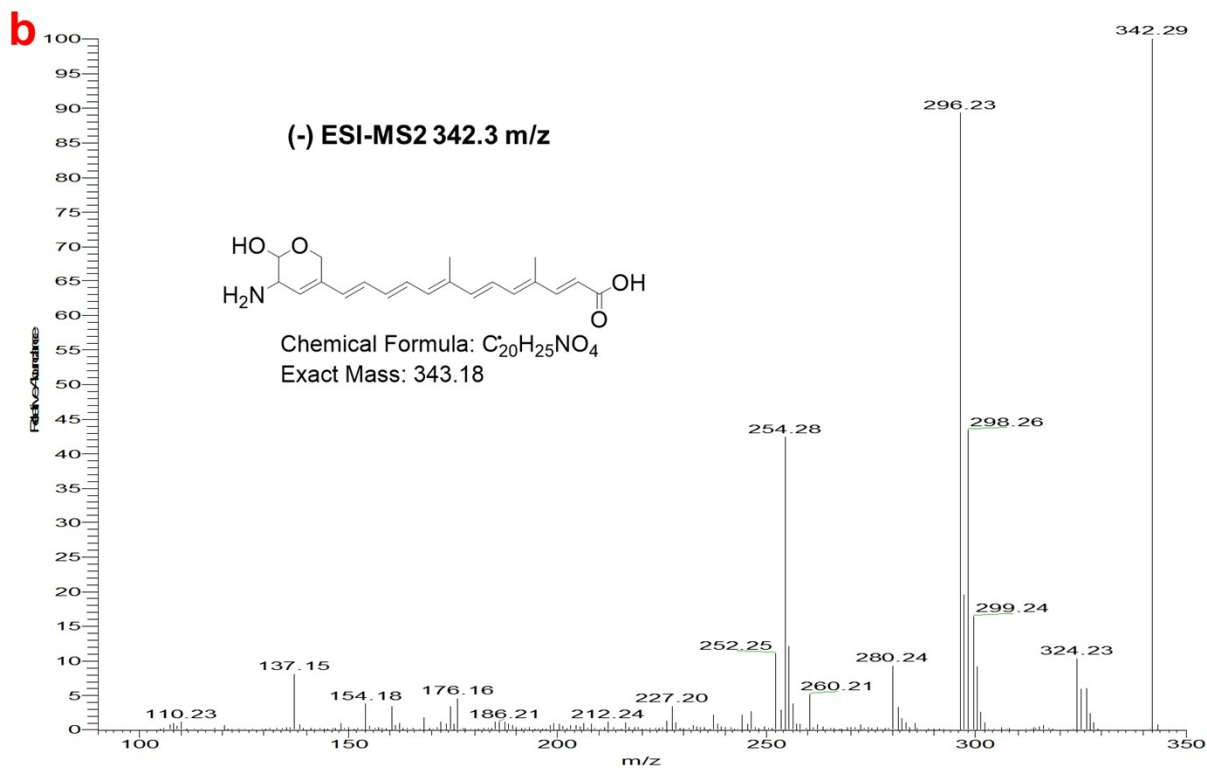

Figure S2. a) The mass spectra from the LC-ESI-MS2 analysis of the oxidized product of NBX with a peak at 323 m/z, and its proposed structure formed upon the treatment by the HRP/His and HRP/H<sub>2</sub>O<sub>2</sub> systems. b) The mass spectra from the LC-ESI-MS2 analysis of the oxidized product of NBX with a peak at 342 m/z, and its proposed structure formed only upon the treatment by the HRP/His system.

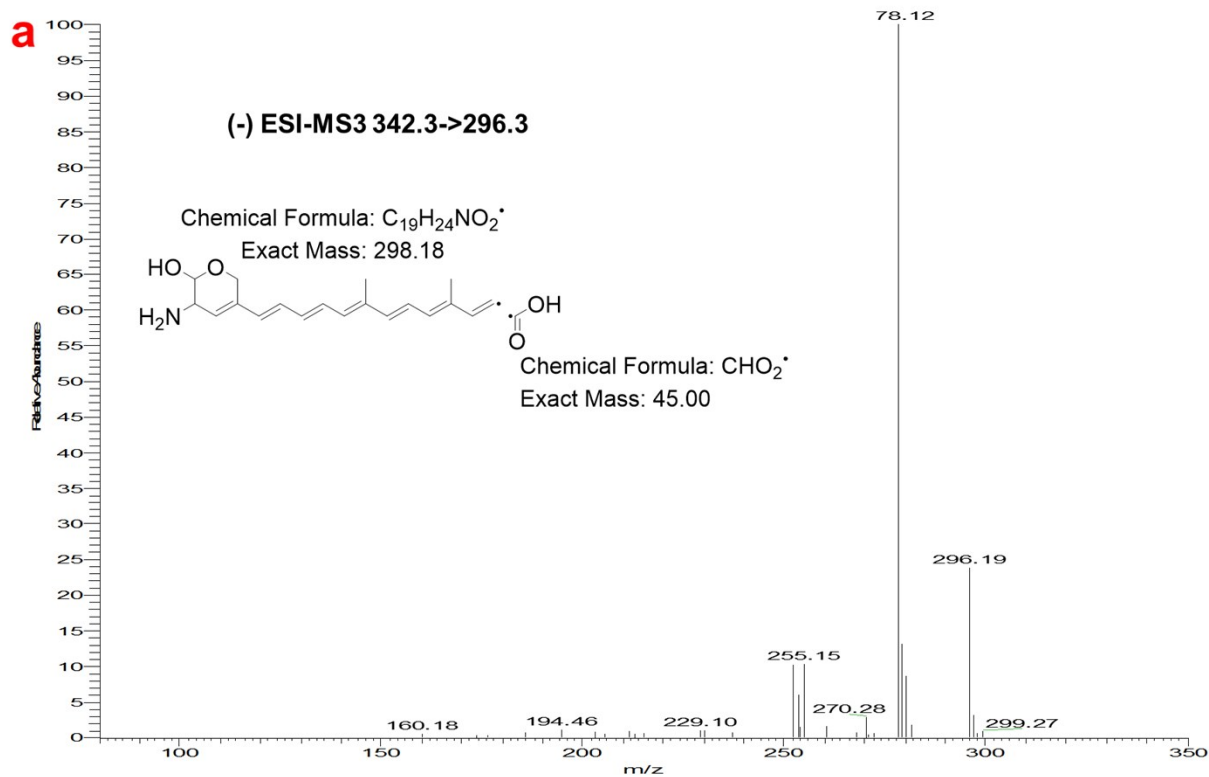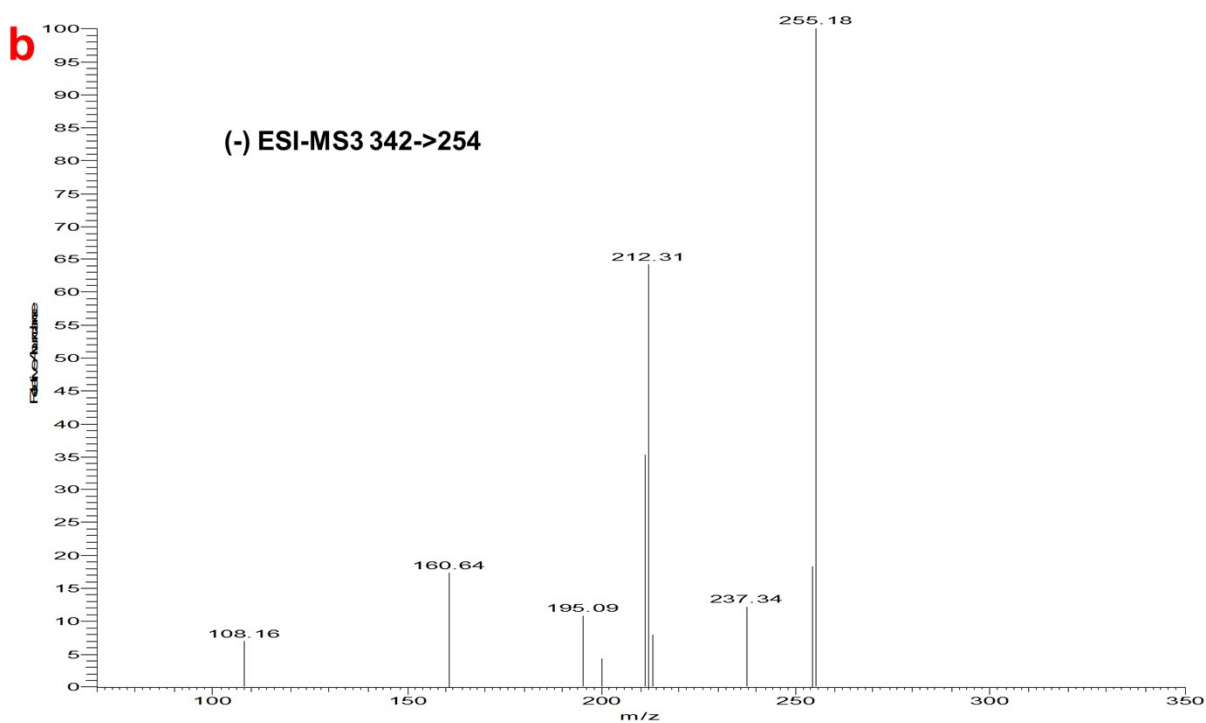

Figure S3. a) The mass spectra from the LC-ESI-MS3 analysis of the oxidized product of NBX at 296 m/z, and its proposed structure, originating from the peak at 342 m/z upon the treatment by

the HRP/His system. b) The mass spectra from the LC-ESI-MS3 analysis of the oxidized product of NBX at 254 m/z, originating from the peak at 342 m/z upon the treatment with the HRP/His system.
